# Supplementary material
Source: publisher site journal article supplement (https://www.spandidos-publications.com/7663/downloadSupplementary)
Supplement: Supplementary file 1 [file downloadSupplementary]

Table SI. STR profiles of Wt-HL60 and Res-HL60 cell lines.

| Locus   | HL-60<br>(Cellosaurus CVCL_0002) | Wt-HL60 | Res-HL60 |
|---------|----------------------------------|---------|----------|
| TH01    | 7, 8                             | 7, 8    | 7, 8     |
| D21S11  | 29, 30                           | 29, 30  | 29, 30   |
| D5S818  | 12                               | 12      | 12       |
| D13S317 | 8, 11                            | 8, 11   | 8, 11    |
| D7S820  | 11, 12                           | 11, 12  | 11, 12   |
| D16S539 | 11                               | 11      | 11       |
| CSF1PO  | 13, 14                           | 13, 14  | 13, 14   |
| AMEL    | X                                | X       | X        |
| vWA     | 16                               | 16      | 16       |
| TPOX    | 8, 11                            | 8, 11   | 8, 11    |

Ten STR loci, including AMEL, TH01, and D13S317, were analyzed to verify the authenticity of the Res-HL60 cell line. STR profiling was performed by BEX Co., Ltd. (Tokyo, Japan). The STR profiles of Wt-HL60 and Res-HL60 cells were identical, confirming that Res-HL60 was derived from the Wt-HL60 line, which corresponds to the Cellosaurus HL-60 reference (CVCL\_0002). STR, short tandem repeat; Wt, wild type; Res, resistant.
